# Supplementary material for: Facile synthesis of ytterbium doped cesium lead halide perovskite powder
Source: Royal Society of Chemistry journal article supplement (doi:10.1039/d3tc02631k), 2023-01-01
Supplement: d3tc02631k1.pdf [file d3tc02631k1.pdf]

## Supplementary information

### Facile synthesis of ytterbium doped caesium lead halide perovskite powder

Simona Streckaitė, Lukas Miklušis, Karolina Maleckaitė, Lamiaa Abdelrazik, Vidmantas Jašinskas, Vidas Pakštas, Audrius Drabavičius, Danielis Rutkauskas, Marius Franckevičius, Vidmantas Gulbinas

Center for Physical Sciences and Technology, Sauletekio Ave. 3, LT-10257 Vilnius, Lithuania

Figure S1B shows the evolution of the fluorescence measured at a few steps of the wet synthesis of CsPbCl<sub>3</sub> perovskite: 1 – short grinding of water-dissolved precursor materials, 2 – longer grinding, 3 – annealing, 4 – additional grinding, 5 – additional annealing.

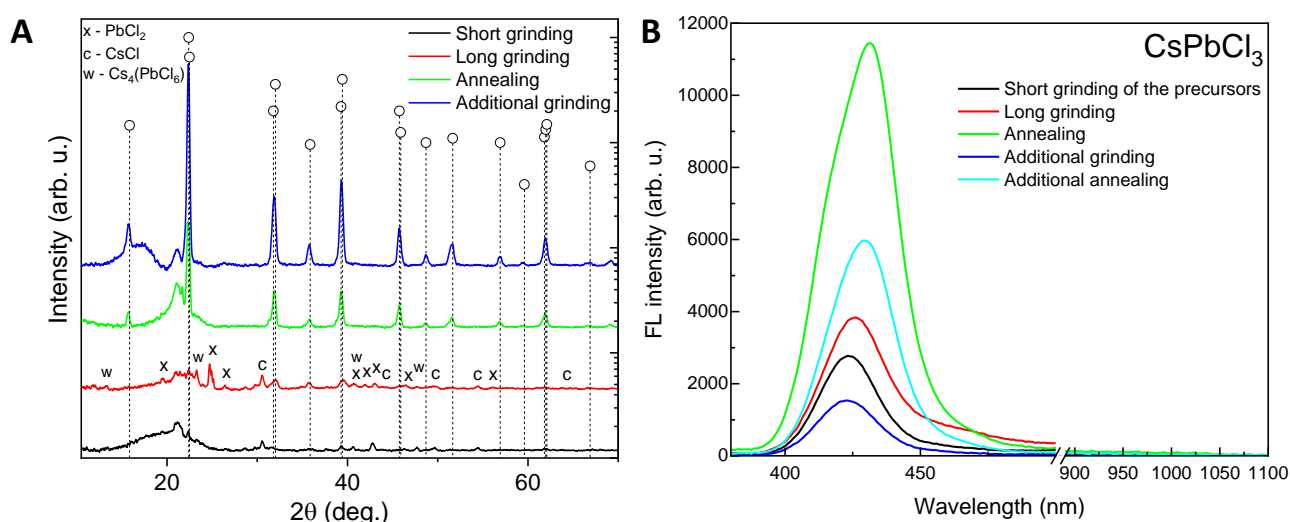

Fig. S1. XRD (A) and VIS-NIR emission spectra (B) at several steps of mechanosynthesis of CsPbCl<sub>3</sub> powder prepared by the wet synthesis. In A, dotted lines mark the XRD pattern of the orthorhombic CsPbCl<sub>3</sub> standard (ICDD # 04-024-6243). In B,  $\lambda_{exc} = 375$  nm.

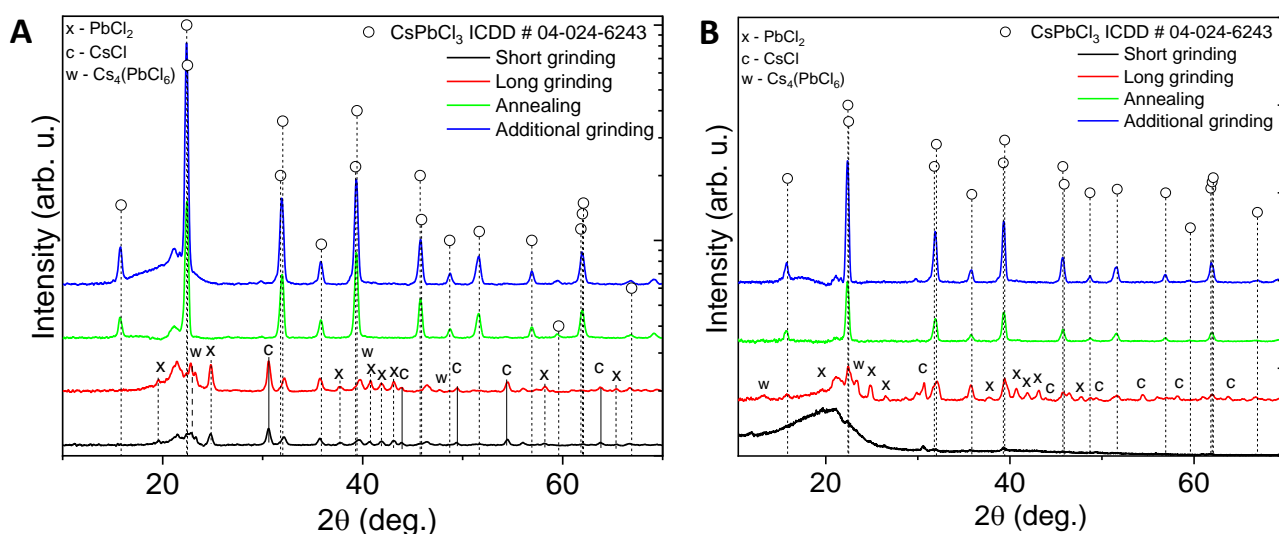

Fig. S2. XRD at several steps of mechanosynthesis of Yb<sup>3+</sup> doped CsPbCl<sub>3</sub> powder prepared by the dry (A) and wet (B) syntheses. Dotted lines mark the XRD pattern of the orthorhombic CsPbCl<sub>3</sub> standard (ICDD # 04-024-6243).

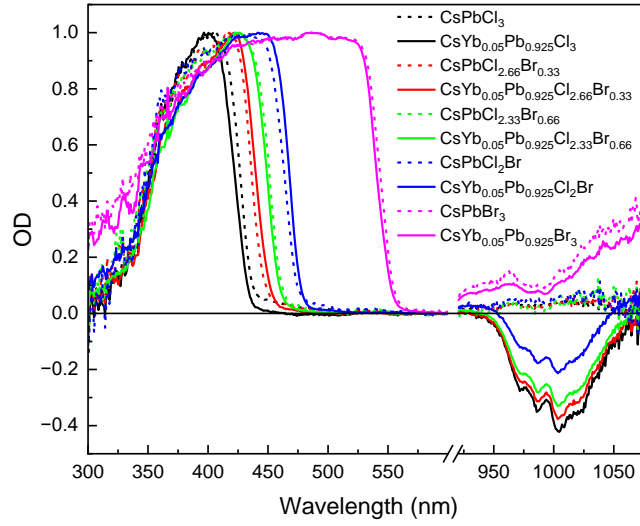

Fig. S3. Absorption spectra of undoped (dotted lines) and  $\text{Yb}^{3+}$  doped (solid lines)  $\text{CsPb}(\text{Cl}_{1-x}\text{Br}_x)_3$  powders in thin quasi-transparent layers prepared by mixing it with a thermoplastic polymer. Powders were prepared by the wet synthesis. Samples were measured by the integrating sphere. These spectra are identical to the raw power spectra.

Table S1. Interatomic distances and crystallite sizes of  $\text{Yb}^{3+}$  doped  $\text{CsPb}(\text{Cl}_{1-x}\text{Br}_x)_3$  powders calculated from the XRD peak shifts.

|                                                                       | a (Å) | b (Å)  | c (Å) | Crystallite size (nm) |
|-----------------------------------------------------------------------|-------|--------|-------|-----------------------|
| $\text{CsPbCl}_3$                                                     | 7.902 | 11.248 | 7.899 | 47.4                  |
| $\text{CsYb}_{0.05}\text{Pb}_{0.925}\text{Cl}_3$                      | 7.937 | 11.233 | 7.908 | 49.2                  |
| $\text{CsPbCl}_{2.66}\text{Br}_{0.33}$                                | 7.962 | 11.294 | 7.953 | 38.7                  |
| $\text{CsYb}_{0.05}\text{Pb}_{0.925}\text{Cl}_{2.66}\text{Br}_{0.33}$ | 7.967 | 11.333 | 7.979 | 35.3                  |
| $\text{CsPbCl}_2\text{Br}$                                            | 8.205 | 11.795 | 8.255 | 68.1                  |
| $\text{CsYb}_{0.05}\text{Pb}_{0.925}\text{Cl}_2\text{Br}$             | 8.212 | 11.764 | 8.260 | 84.3                  |

Table S2. The amount of each element in different grains of  $\text{Yb}^{3+}$  doped  $\text{CsPbCl}_3$  powder sample measured by EDX scans. Also, the elemental composition of undoped sample is shown for comparison.

|                                                                    | Cl (%) | Cs (%) | Pb (%) | Yb (%) |
|--------------------------------------------------------------------|--------|--------|--------|--------|
| <b><math>\text{CsYb}_{0.05}\text{Pb}_{0.925}\text{Cl}_3</math></b> |        |        |        |        |
| EDX1                                                               | 56.98  | 18.01  | 21.08  | 3.91   |
| EDX2                                                               | 55.88  | 18.79  | 21.51  | 3.80   |
| EDX3                                                               | 47.42  | 24.37  | 22.18  | 6.00   |
| EDX4                                                               | 57.28  | 19.25  | 19.57  | 3.89   |
| EDX5                                                               | 51.32  | 20.00  | 21.07  | 7.59   |
| EDX6                                                               | 42.99  | 26.82  | 26.10  | 4.08   |
| EDX7                                                               | 42.85  | 26.93  | 23.11  | 7.09   |
| <b><math>\text{CsPbCl}_3</math></b>                                |        |        |        |        |
| EDX1                                                               | 62.38  | 18.13  | 19.47  | -      |

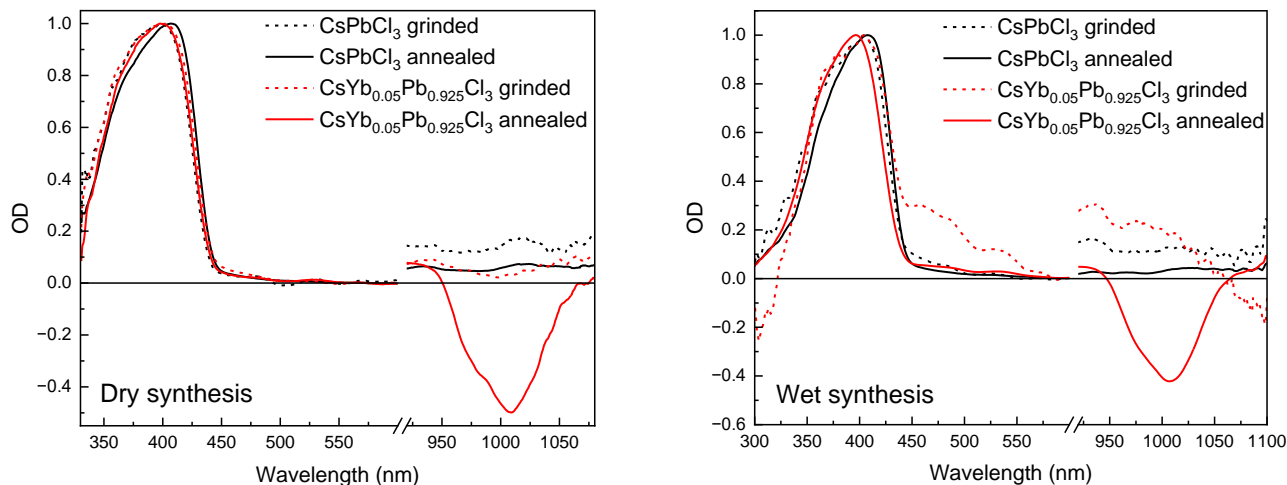

Fig. S4. Absorption spectra of undoped (black lines) and  $\text{Yb}^{3+}$  doped (red lines)  $\text{CsPbCl}_3$  powder at two steps of dry (A) and wet (B) synthesis: ground precursor powder and after annealing this powder. Powder was measured in the integrating sphere; therefore, we can observe ytterbium emission in the NIR as the negative signal.

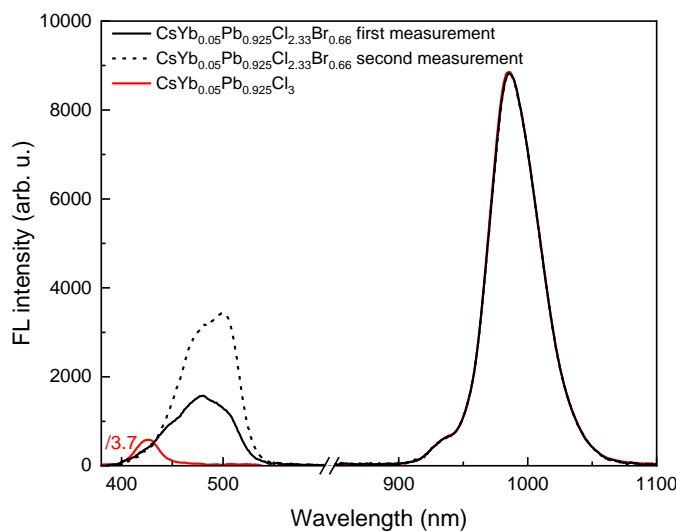

Fig. S5. VIS-NIR emission spectra of  $\text{Yb}^{3+}$  doped  $\text{CsPbCl}_{2.33}\text{Br}_{0.66}$  powder prepared by the wet synthesis (black lines). Sample was measured two times consequently at the same spot.  $\lambda_{exc} = 375$  nm. NIR emission is reduced with the 5% light transmission filter. Also,  $\text{Yb}^{3+}$  doped  $\text{CsPbCl}_3$  fluorescence spectrum (red line), normalized to the NIR emission intensity, is shown for comparison.

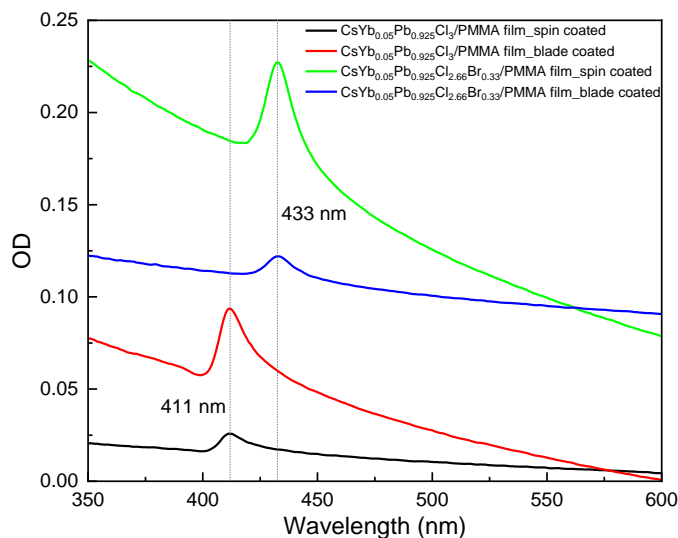

Fig. S6. Absorption spectra of  $\text{Yb}^{3+}$  doped  $\text{CsPb}(\text{Cl}_{1-x}\text{Br}_x)_3$  thin films prepared from the powders, sonicated in PMMA polymer. Films were fabricated in two ways: spin coated and blade coated.

Table S3. Bright field 10x microscopy images of undoped and Yb<sup>3+</sup> doped CsPb(Cl<sub>1-x</sub>Br<sub>x</sub>)<sub>3</sub> powders. Scale bar represents 100 μm.

| Powder                                                               | Undoped                                                                             | Yb <sup>3+</sup> Doped                                                               |
|----------------------------------------------------------------------|-------------------------------------------------------------------------------------|--------------------------------------------------------------------------------------|
| CsPbCl <sub>3</sub>                                                  | 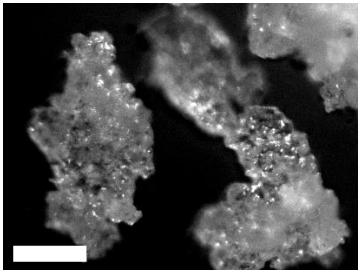   |    |
| CsPbCl <sub>2.33</sub> Br <sub>0.66</sub>                            |    |    |
| CsPbCl <sub>2.66</sub> Br <sub>0.33</sub>                            |   |   |
| CsPbCl <sub>2.66</sub> Br <sub>0.33</sub><br>sonicated in<br>toluene | -                                                                                   |  |
| CsPbBr <sub>3</sub>                                                  |  |  |

Table S4. Data for NIR PLQY calculations obtained from integrating sphere measurements: laser spectra (black lines), sample spectra (red lines) and the values of the integrated areas in the tables below the spectra. For each powder composition multiple samples were prepared, and each sample was measured several times at different spots by slightly changing the sample position in the integrating sphere. Spectra and integrated areas are presented for one of these measurements for one sample. Also, average QY values are shown for each sample.  $\lambda_{exc} = 375$  nm.

| Synthesis method | $CsYb_{0.05}Pb_{0.925}Cl_3$                                                                                                                                                                                                                                                                                                                                                                                                                                                                                                                                                                                                                                                                                                                                                                              | QY <sub>average</sub> (%) |                     |                     |                     |                   |                |             |    |  |    |    |    |    |           |           |  |       |        |         |        |        |         |   |    |        |        |         |        |        |         |           |      |     |
|------------------|----------------------------------------------------------------------------------------------------------------------------------------------------------------------------------------------------------------------------------------------------------------------------------------------------------------------------------------------------------------------------------------------------------------------------------------------------------------------------------------------------------------------------------------------------------------------------------------------------------------------------------------------------------------------------------------------------------------------------------------------------------------------------------------------------------|---------------------------|---------------------|---------------------|---------------------|-------------------|----------------|-------------|----|--|----|----|----|----|-----------|-----------|--|-------|--------|---------|--------|--------|---------|---|----|--------|--------|---------|--------|--------|---------|-----------|------|-----|
| Wet synthesis    | 1 step: H <sub>2</sub> O dissolved+mechanosynthesis<br>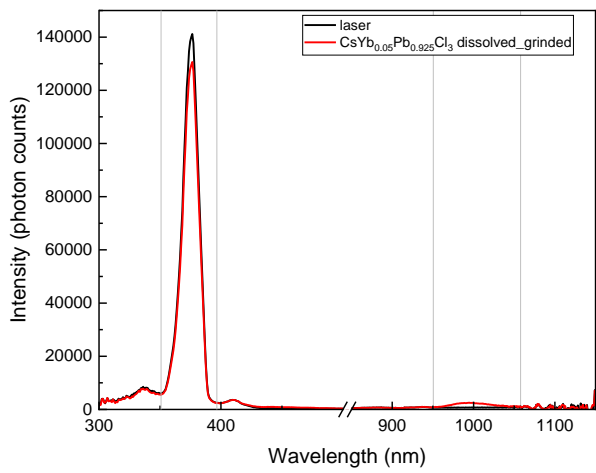 <table border="1"> <thead> <tr> <th>Sample</th> <th>Yb Integral from</th> <th>Yb Integral to</th> <th>Laser Integral from</th> <th>Laser Integral to</th> <th>Laser Integral</th> <th>Yb Integral</th> <th>QY</th> </tr> <tr> <td></td> <td>nm</td> <td>nm</td> <td>nm</td> <td>nm</td> <td>counts*nm</td> <td>counts*nm</td> <td></td> </tr> </thead> <tbody> <tr> <td>laser</td> <td>950.5</td> <td>1057.78</td> <td>350.87</td> <td>396.65</td> <td>2364071</td> <td>0</td> <td>--</td> </tr> <tr> <td>powder</td> <td>950.5</td> <td>1057.78</td> <td>350.87</td> <td>396.65</td> <td>2187591</td> <td>108811.30</td> <td>0.62</td> </tr> </tbody> </table> | Sample                    | Yb Integral from    | Yb Integral to      | Laser Integral from | Laser Integral to | Laser Integral | Yb Integral | QY |  | nm | nm | nm | nm | counts*nm | counts*nm |  | laser | 950.5  | 1057.78 | 350.87 | 396.65 | 2364071 | 0 | -- | powder | 950.5  | 1057.78 | 350.87 | 396.65 | 2187591 | 108811.30 | 0.62 | 64  |
|                  | Sample                                                                                                                                                                                                                                                                                                                                                                                                                                                                                                                                                                                                                                                                                                                                                                                                   | Yb Integral from          | Yb Integral to      | Laser Integral from | Laser Integral to   | Laser Integral    | Yb Integral    | QY          |    |  |    |    |    |    |           |           |  |       |        |         |        |        |         |   |    |        |        |         |        |        |         |           |      |     |
|                  | nm                                                                                                                                                                                                                                                                                                                                                                                                                                                                                                                                                                                                                                                                                                                                                                                                       | nm                        | nm                  | nm                  | counts*nm           | counts*nm         |                |             |    |  |    |    |    |    |           |           |  |       |        |         |        |        |         |   |    |        |        |         |        |        |         |           |      |     |
| laser            | 950.5                                                                                                                                                                                                                                                                                                                                                                                                                                                                                                                                                                                                                                                                                                                                                                                                    | 1057.78                   | 350.87              | 396.65              | 2364071             | 0                 | --             |             |    |  |    |    |    |    |           |           |  |       |        |         |        |        |         |   |    |        |        |         |        |        |         |           |      |     |
| powder           | 950.5                                                                                                                                                                                                                                                                                                                                                                                                                                                                                                                                                                                                                                                                                                                                                                                                    | 1057.78                   | 350.87              | 396.65              | 2187591             | 108811.30         | 0.62           |             |    |  |    |    |    |    |           |           |  |       |        |         |        |        |         |   |    |        |        |         |        |        |         |           |      |     |
|                  | 2 step: Annealed at 500 °C<br> <table border="1"> <thead> <tr> <th>Sample</th> <th>Yb Integral from</th> <th>Yb Integral to</th> <th>Laser Integral from</th> <th>Laser Integral to</th> <th>Laser Integral</th> <th>Yb Integral</th> <th>QY</th> </tr> <tr> <td></td> <td>nm</td> <td>nm</td> <td>nm</td> <td>nm</td> <td>counts*nm</td> <td>counts*nm</td> <td></td> </tr> </thead> <tbody> <tr> <td>laser</td> <td>899.99</td> <td>1103.14</td> <td>350.87</td> <td>398.48</td> <td>2625441</td> <td>0</td> <td>--</td> </tr> <tr> <td>powder</td> <td>899.99</td> <td>1103.14</td> <td>350.87</td> <td>398.48</td> <td>2087293</td> <td>580985.34</td> <td>1.08</td> </tr> </tbody> </table>                      | Sample                    | Yb Integral from    | Yb Integral to      | Laser Integral from | Laser Integral to | Laser Integral | Yb Integral | QY |  | nm | nm | nm | nm | counts*nm | counts*nm |  | laser | 899.99 | 1103.14 | 350.87 | 398.48 | 2625441 | 0 | -- | powder | 899.99 | 1103.14 | 350.87 | 398.48 | 2087293 | 580985.34 | 1.08 | 108 |
| Sample           | Yb Integral from                                                                                                                                                                                                                                                                                                                                                                                                                                                                                                                                                                                                                                                                                                                                                                                         | Yb Integral to            | Laser Integral from | Laser Integral to   | Laser Integral      | Yb Integral       | QY             |             |    |  |    |    |    |    |           |           |  |       |        |         |        |        |         |   |    |        |        |         |        |        |         |           |      |     |
|                  | nm                                                                                                                                                                                                                                                                                                                                                                                                                                                                                                                                                                                                                                                                                                                                                                                                       | nm                        | nm                  | nm                  | counts*nm           | counts*nm         |                |             |    |  |    |    |    |    |           |           |  |       |        |         |        |        |         |   |    |        |        |         |        |        |         |           |      |     |
| laser            | 899.99                                                                                                                                                                                                                                                                                                                                                                                                                                                                                                                                                                                                                                                                                                                                                                                                   | 1103.14                   | 350.87              | 398.48              | 2625441             | 0                 | --             |             |    |  |    |    |    |    |           |           |  |       |        |         |        |        |         |   |    |        |        |         |        |        |         |           |      |     |
| powder           | 899.99                                                                                                                                                                                                                                                                                                                                                                                                                                                                                                                                                                                                                                                                                                                                                                                                   | 1103.14                   | 350.87              | 398.48              | 2087293             | 580985.34         | 1.08           |             |    |  |    |    |    |    |           |           |  |       |        |         |        |        |         |   |    |        |        |         |        |        |         |           |      |     |

PMMA film by drop casting

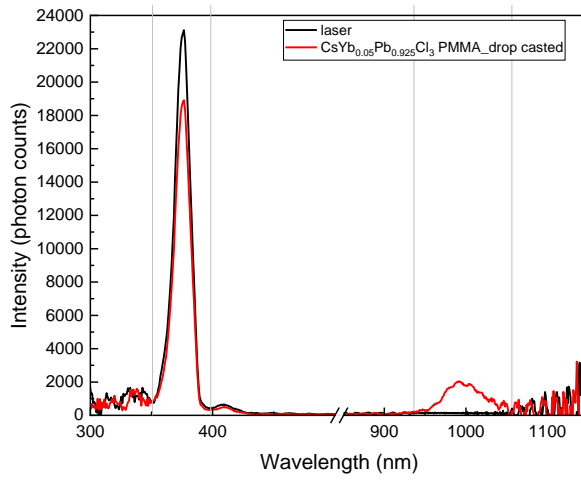

| Sample | Yb Integral from | Yb Integral to | Laser Integral from | Laser Integral to | Laser Integral | Yb Integral | QY   |
|--------|------------------|----------------|---------------------|-------------------|----------------|-------------|------|
|        | nm               | nm             | nm                  | nm                | counts*nm      | counts*nm   |      |
| laser  | 936.35           | 1056.04        | 350.87              | 398.48            | 385911.6       | 0           | --   |
| powder | 936.35           | 1056.04        | 350.87              | 398.48            | 317125.5       | 111434.75   | 1.62 |

162

1 step: Mechano-synthesis

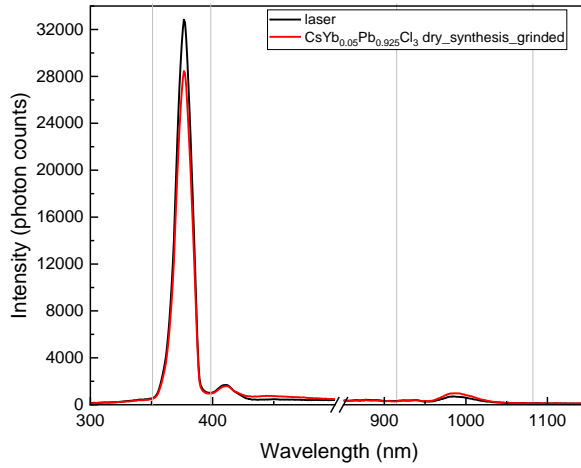

| Sample | Yb Integral from | Yb Integral to | Laser Integral from | Laser Integral to | Laser Integral | Yb Integral | QY   |
|--------|------------------|----------------|---------------------|-------------------|----------------|-------------|------|
|        | nm               | nm             | nm                  | nm                | counts*nm      | counts*nm   |      |
| laser  | 915.08           | 1082.23        | 350.87              | 398.48            | 2663303        | 0           | --   |
| powder | 915.08           | 1082.23        | 350.87              | 398.48            | 2313810        | 132267.43   | 0.38 |

Dry synthesis

38

2 step: Annealed at 200 °C

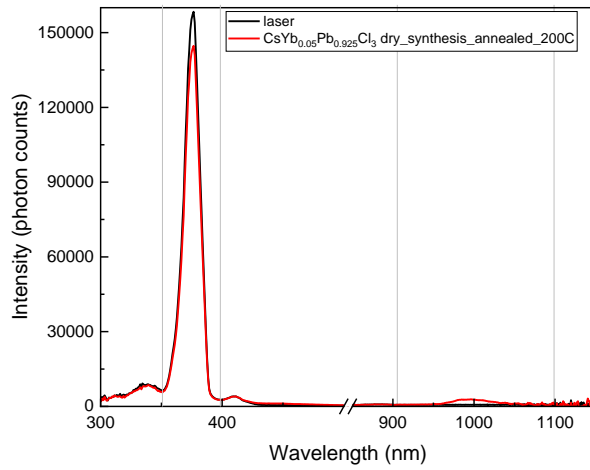

| Sample | Yb Integral from | Yb Integral to | Laser Integral from | Laser Integral to | Laser Integral | Yb Integral | QY   |
|--------|------------------|----------------|---------------------|-------------------|----------------|-------------|------|
|        | nm               | nm             | nm                  | nm                | counts*nm      | counts*nm   |      |
| laser  | 905.32           | 1098.79        | 350.87              | 398.48            | 2653931        | 0           | --   |
| powder | 905.32           | 1098.79        | 350.87              | 398.48            | 2426310        | 142624.13   | 0.63 |

63

Additional step: Sonicated

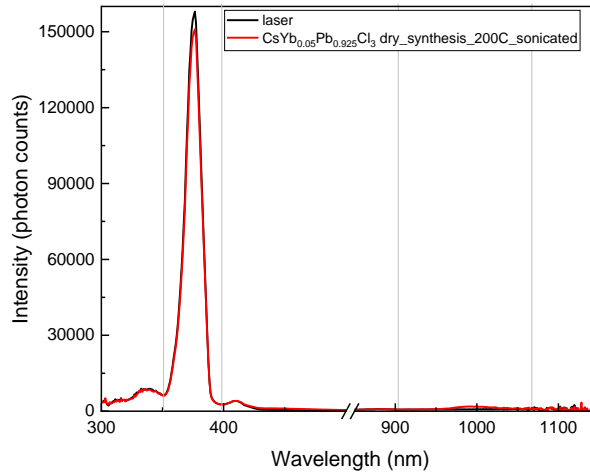

| Sample | Yb Integral from | Yb Integral to | Laser Integral from | Laser Integral to | Laser Integral | Yb Integral | QY   |
|--------|------------------|----------------|---------------------|-------------------|----------------|-------------|------|
|        | nm               | nm             | nm                  | nm                | counts*nm      | counts*nm   |      |
| laser  | 903.54           | 1067.4         | 350.87              | 398.48            | 2644551        | 0           | --   |
| powder | 903.54           | 1067.4         | 350.87              | 398.48            | 2530955        | 72142.295   | 0.64 |

64

2 step: Annealed at 500 °C

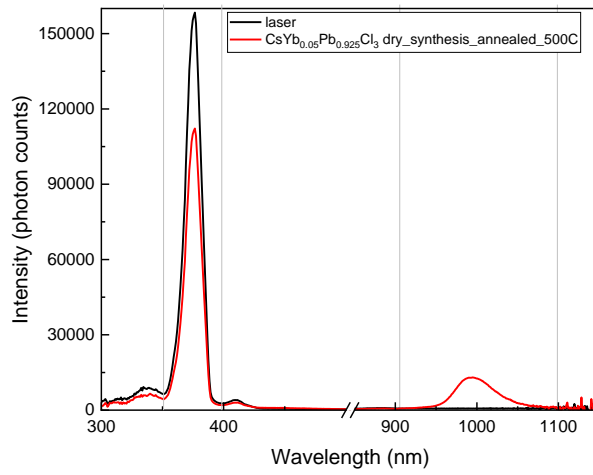

| Sample | Yb Integral from | Yb Integral to | Laser Integral from | Laser Integral to | Laser Integral | Yb Integral | QY   |
|--------|------------------|----------------|---------------------|-------------------|----------------|-------------|------|
|        | nm               | nm             | nm                  | nm                | counts*nm      | counts*nm   |      |
| laser  | 905.32           | 1098.79        | 350.87              | 398.48            | 2653931        | 0           | --   |
| powder | 905.32           | 1098.79        | 350.87              | 398.48            | 1877855        | 802457.28   | 1.03 |

110

Additional step: Sonicated

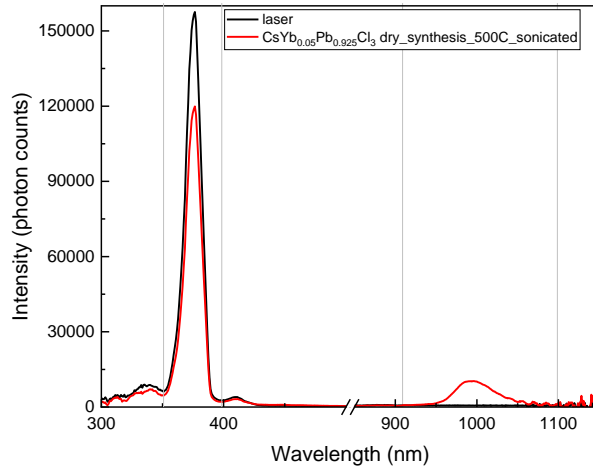

| Sample | Yb Integral from | Yb Integral to | Laser Integral from | Laser Integral to | Laser Integral | Yb Integral | QY   |
|--------|------------------|----------------|---------------------|-------------------|----------------|-------------|------|
|        | nm               | nm             | nm                  | nm                | counts*nm      | counts*nm   |      |
| laser  | 908.87           | 1098.79        | 350.87              | 398.48            | 2639551        | 0           | --   |
| powder | 908.87           | 1098.79        | 350.87              | 398.48            | 2005784        | 631872.68   | 1.00 |

103

CsYb<sub>0.05</sub>Pb<sub>0.925</sub>Cl<sub>2.33</sub>Br<sub>0.66</sub>



1 step: H<sub>2</sub>O dissolved+mechanosynthesis

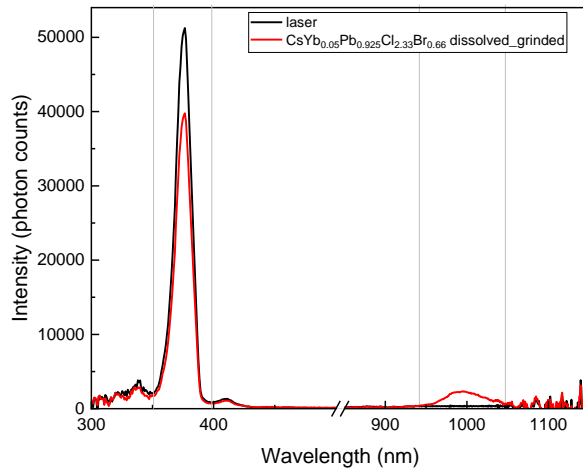

| Sample | Yb Integral from | Yb Integral to | Laser Integral from | Laser Integral to | Laser Integral | Yb Integral | QY    |
|--------|------------------|----------------|---------------------|-------------------|----------------|-------------|-------|
|        | nm               | nm             | nm                  | nm                | counts*nm      | counts*nm   |       |
| laser  | 941.66           | 1047.29        | 350.87              | 398.48            | 860135.0       | 0           | --    |
| powder | 941.66           | 1047.29        | 350.87              | 398.48            | 669722.3       | 116203.12   | 0.610 |

59

Wet synthesis

2 step: Annealed at 200 °C

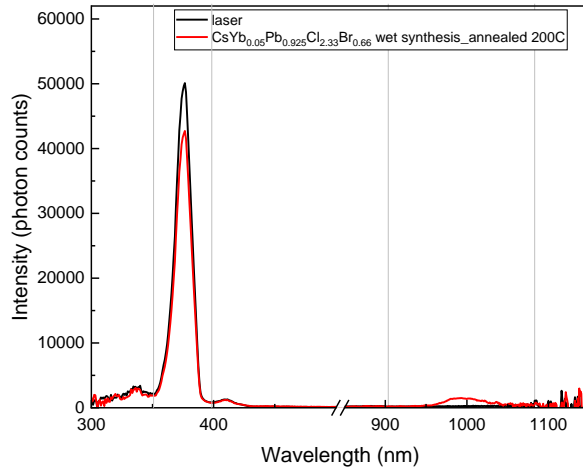

| Sample | Yb Integral from | Yb Integral to | Laser Integral from | Laser Integral to | Laser Integral | Yb Integral | QY   |
|--------|------------------|----------------|---------------------|-------------------|----------------|-------------|------|
|        | nm               | nm             | nm                  | nm                | counts*nm      | counts*nm   |      |
| laser  | 903.54           | 1083.11        | 350.87              | 396.65            | 840970.7       | 0           | --   |
| powder | 903.54           | 1083.11        | 350.87              | 396.65            | 716776.0       | 79668.014   | 0.64 |

66

2 step: Annealed at 500 °C

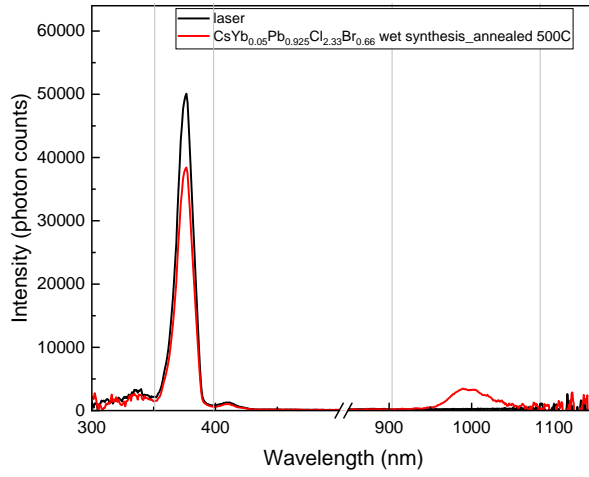

| Sample | Yb Integral from | Yb Integral to | Laser Integral from | Laser Integral to | Laser Integral | Yb Integral | QY   |
|--------|------------------|----------------|---------------------|-------------------|----------------|-------------|------|
|        | nm               | nm             | nm                  | nm                | counts*nm      | counts*nm   |      |
| laser  | 903.54           | 1083.11        | 350.87              | 398.48            | 840970.7       | 0           | --   |
| powder | 903.54           | 1083.11        | 350.87              | 398.48            | 645145.8       | 201230.45   | 1.03 |

104

1 step: Mechano-synthesis

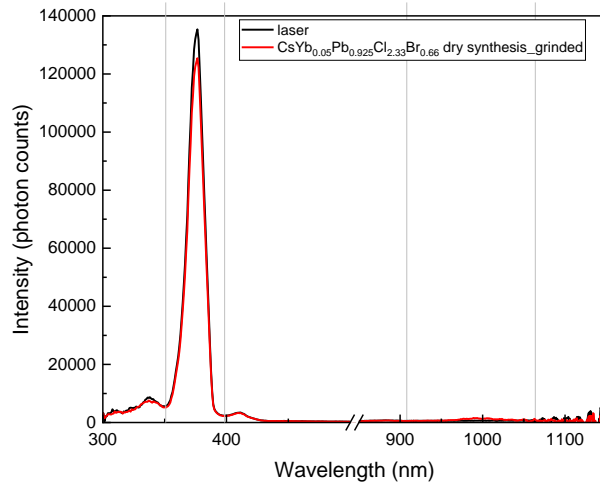

| Sample | Yb Integral from | Yb Integral to | Laser Integral from | Laser Integral to | Laser Integral | Yb Integral | QY   |
|--------|------------------|----------------|---------------------|-------------------|----------------|-------------|------|
|        | nm               | nm             | nm                  | nm                | counts*nm      | counts*nm   |      |
| laser  | 907.98           | 1063.9         | 350.87              | 398.48            | 210631.9       | 0           | --   |
| powder | 907.98           | 1063.9         | 350.87              | 398.48            | 195153.2       | 46269.004   | 0.28 |

Dry synthesis

28

2 step: Annealed at 200 °C

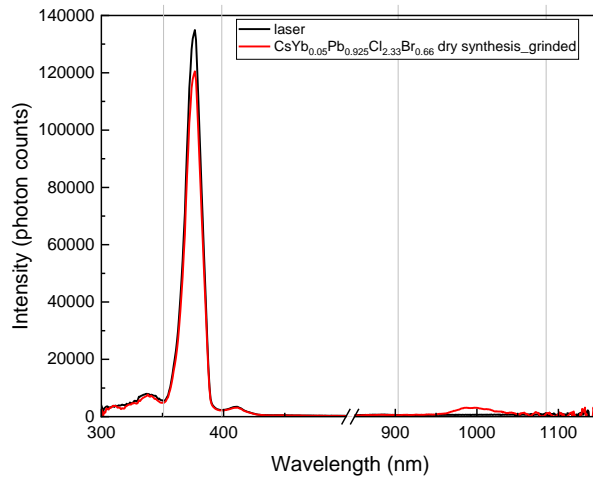

| Sample | Yb Integral from | Yb Integral to | Laser Integral from | Laser Integral to | Laser Integral | Yb Integral | QY   |
|--------|------------------|----------------|---------------------|-------------------|----------------|-------------|------|
|        | nm               | nm             | nm                  | nm                | counts*nm      | counts*nm   |      |
| laser  | 903.54           | 1084.85        | 350.87              | 398.48            | 2262894.0      | 0           | --   |
| powder | 903.54           | 1084.85        | 350.87              | 398.48            | 2024022.3      | 149457.5    | 0.63 |

66

2 step: Annealed at 500 °C

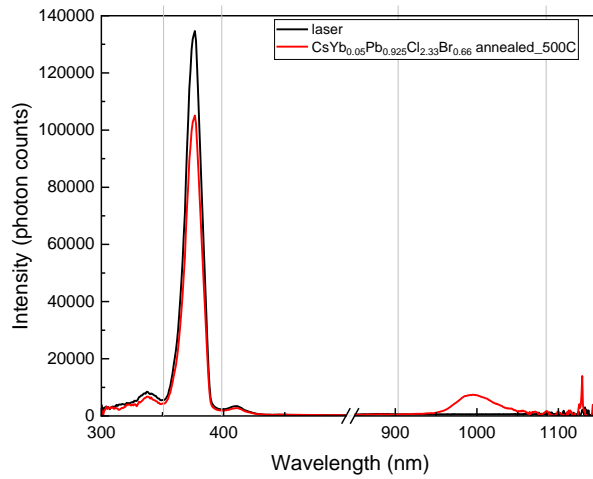

| Sample | Yb Integral from | Yb Integral to | Laser Integral from | Laser Integral to | Laser Integral | Yb Integral | QY   |
|--------|------------------|----------------|---------------------|-------------------|----------------|-------------|------|
|        | nm               | nm             | nm                  | nm                | counts*nm      | counts*nm   |      |
| laser  | 903.54           | 1084.85        | 350.87              | 398.48            | 2260350.2      | 0           | --   |
| powder | 903.54           | 1084.85        | 350.87              | 398.48            | 1763615.4      | 430996.0    | 0.87 |

89

$\text{CsYb}_{0.01}\text{Pb}_{0.985}\text{Cl}_3$

Wet synthesis,  
annealed at 500 °C

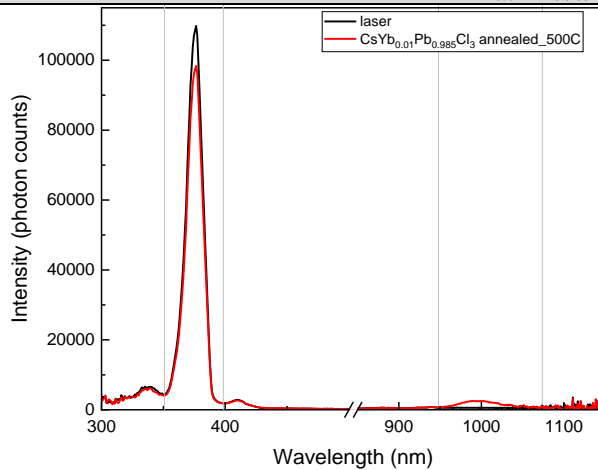

| Sample | Yb Integral from | Yb Integral to | Laser Integral from | Laser Integral to | Laser Integral | Yb Integral | QY   |
|--------|------------------|----------------|---------------------|-------------------|----------------|-------------|------|
|        | nm               | nm             | nm                  | nm                | counts*nm      | counts*nm   |      |
| laser  | 947.85           | 1074.38        | 350.87              | 398.48            | 177416.793     | 0           | --   |
| powder | 947.85           | 1074.38        | 350.87              | 398.48            | 159482.546     | 122682.42   | 0.66 |

66

CsYb<sub>0.03</sub>Pb<sub>0.955</sub>Cl<sub>3</sub>

73

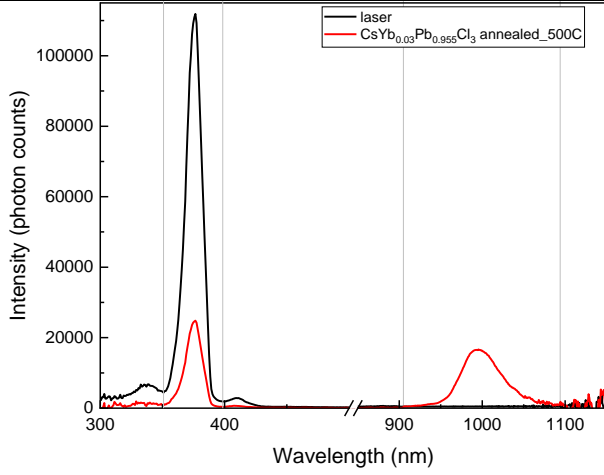

| Sample | Yb Integral from | Yb Integral to | Laser Integral from | Laser Integral to | Laser Integral | Yb Integral | QY   |
|--------|------------------|----------------|---------------------|-------------------|----------------|-------------|------|
|        | nm               | nm             | nm                  | nm                | counts*nm      | counts*nm   |      |
| laser  | 905.32           | 1094.43        | 350.87              | 398.48            | 1881385.29     | 0           | --   |
| powder | 905.32           | 1094.43        | 350.87              | 398.48            | 417717.857     | 1036308     | 0.71 |

CsYb<sub>0.05</sub>Pb<sub>0.925</sub>Cl<sub>3</sub>

110

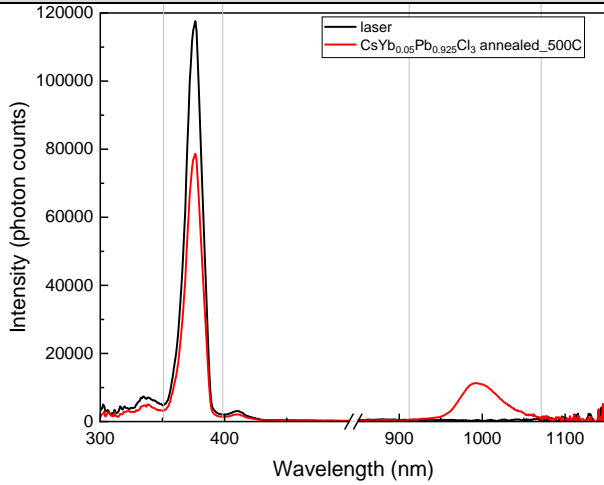

| Sample | Yb Integral from | Yb Integral to | Laser Integral from | Laser Integral to | Laser Integral | Yb Integral | QY   |
|--------|------------------|----------------|---------------------|-------------------|----------------|-------------|------|
|        | nm               | nm             | nm                  | nm                | counts*nm      | counts*nm   |      |
| laser  | 911.53           | 1070.89        | 350.87              | 398.48            | 1927575.50     | 0           | --   |
| powder | 911.53           | 1070.89        | 350.87              | 398.48            | 1321039.07     | 680301.6    | 1.12 |

CsYb<sub>0.07</sub>Pb<sub>0.895</sub>Cl<sub>3</sub>

106

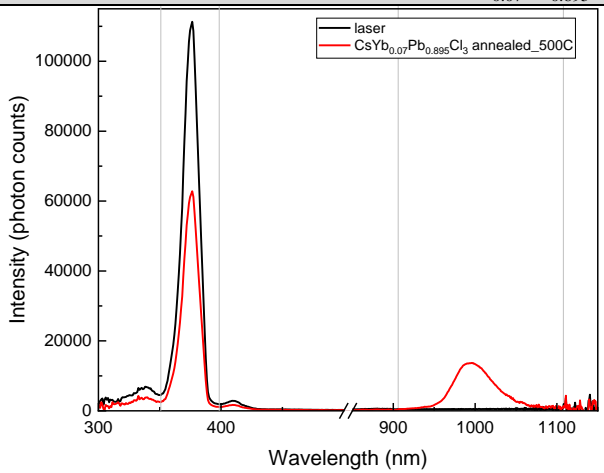

| Sample | Yb Integral from | Yb Integral to | Laser Integral from | Laser Integral to | Laser Integral | Yb Integral | QY   |
|--------|------------------|----------------|---------------------|-------------------|----------------|-------------|------|
|        | nm               | nm             | nm                  | nm                | counts*nm      | counts*nm   |      |
| laser  | 906.2            | 1108.36        | 350.87              | 398.48            | 1870616.00     | 0           | --   |
| powder | 906.2            | 1108.36        | 350.87              | 398.48            | 1053979.09     | 852827.19   | 1.04 |

CsYb<sub>0.09</sub>Pb<sub>0.865</sub>Cl<sub>3</sub>

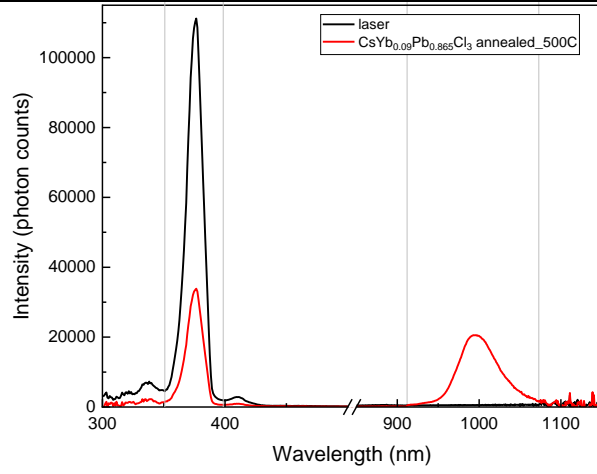

| Sample | Yb Integral from | Yb Integral to | Laser Integral from | Laser Integral to | Laser Integral | Yb Integral | QY   |
|--------|------------------|----------------|---------------------|-------------------|----------------|-------------|------|
|        | nm               | nm             | nm                  | nm                | counts*nm      | counts*nm   |      |
| laser  | 912.42           | 1072.64        | 350.87              | 398.48            | 1870239.7      | 0           | --   |
| powder | 912.42           | 1072.64        | 350.87              | 398.48            | 570816.75      | 1263141     | 0.97 |
